## Subscription and Business Information

*The American Journal of Psychiatry*, ISSN 0002-953X, is published monthly by the American Psychiatric Association.

The American Psychiatric Association does not hold itself responsible for statements made in its publications by contributors or advertisers. Unless so stated, material in *The American Journal of Psychiatry* does not reflect the endorsement, official attitude, or position of the American Psychiatric Association or of the Journal's Editorial Board.

Periodicals postage paid at Washington, DC, and additional mailing offices. POSTMASTER: Send address changes to *The American Journal of Psychiatry*, Circulation Department, American Psychiatric Association, 800 Maine Avenue, S.W., Suite 900, Washington, D.C. 20024.

### Editorial Office

*American Journal of Psychiatry*  
American Psychiatric Association  
800 Maine Avenue, S.W., Suite 900  
Washington, D.C. 20024  
E-mail: [ajp@psych.org](mailto:ajp@psych.org)

### Customer Service

Phone: (800) 368-5777 (toll-free)  
E-mail: [appi@psych.org](mailto:appi@psych.org)

### APA Member Subscription Services

Phone: (888) 35-PSYCH (toll-free)

### Subscriptions

Regular and resident-fellow members in the U.S. receive print and online access as a **member benefit**. Subscriptions for non-members start at \$378 per year. Online only subscriptions start at \$342 per year. Go to <https://www.appi.org/ajp> for more information.

Institutional subscriptions are tier priced. For institutional site license or pricing information, contact (202) 559-3729 or [institutions@psych.org](mailto:institutions@psych.org).

*Additional subscription options, including single issues and student rates*  
Contact Customer Service

### Advertising

*Pharmaceutical Print and Online Advertising*  
Frank Cox, Kathleen Harrison, Tim Wolfinger  
Pharmaceutical Media, Inc.  
30 East 33rd Street  
New York, NY 10016  
Phone: (212) 904-0379  
E-mail: [twolfinger@pminy.com](mailto:twolfinger@pminy.com)

*Nonpharmaceutical and Online Sales*  
Eamon Wood  
Pharmaceutical Media, Inc.  
E-mail: [ewood@pminy.com](mailto:ewood@pminy.com)  
(see address and phone above).

### Permissions and Reprints

Material published in the journals of the American Psychiatric Association and American Psychiatric Association Publishing is protected by copyright and all rights are reserved. Material may not be reproduced in any form or by any means without written permission from the copyright owner. For permission to reproduce material published by APA, please visit <http://www.appi.org/customer-service/permissions> for more information. Permission can also be secured through the Copyright Clearance Center ([www.copyright.com](http://www.copyright.com)).

APA does not require that permission be obtained for the photocopying of isolated articles for nonprofit classroom or library reserve use; all fees associated with such permission are waived. This consent does not extend to other kinds of copying, such as copying for general distribution, for advertising or promotional purposes, for creating new collective works, or for resale. Requests for commercial distribution and bulk reprints should be directed to (202) 609-7075.

Indexed in Abstracts for Social Workers, Academic Abstracts, Biological Abstracts, Chemical Abstracts, Chicago Psychoanalytic Literature Index, Cumulative Index to Nursing Literature, Excerpta Medica, Hospital Literature Index, Index Medicus, International Nursing Index, Nutrition Abstracts, Psychological Abstracts, Science Citation Index, Social Science Source, and Social Sciences Index.

Pages are produced by KnowledgeWorks Global (Waterbury, VT) and printed by Sheridan NH (Hanover, NH) on acid-free paper effective with Volume 169, Number 1, January 2012.

© 2022 American Psychiatric Association.

# YOU CAN SAVE LIVES.

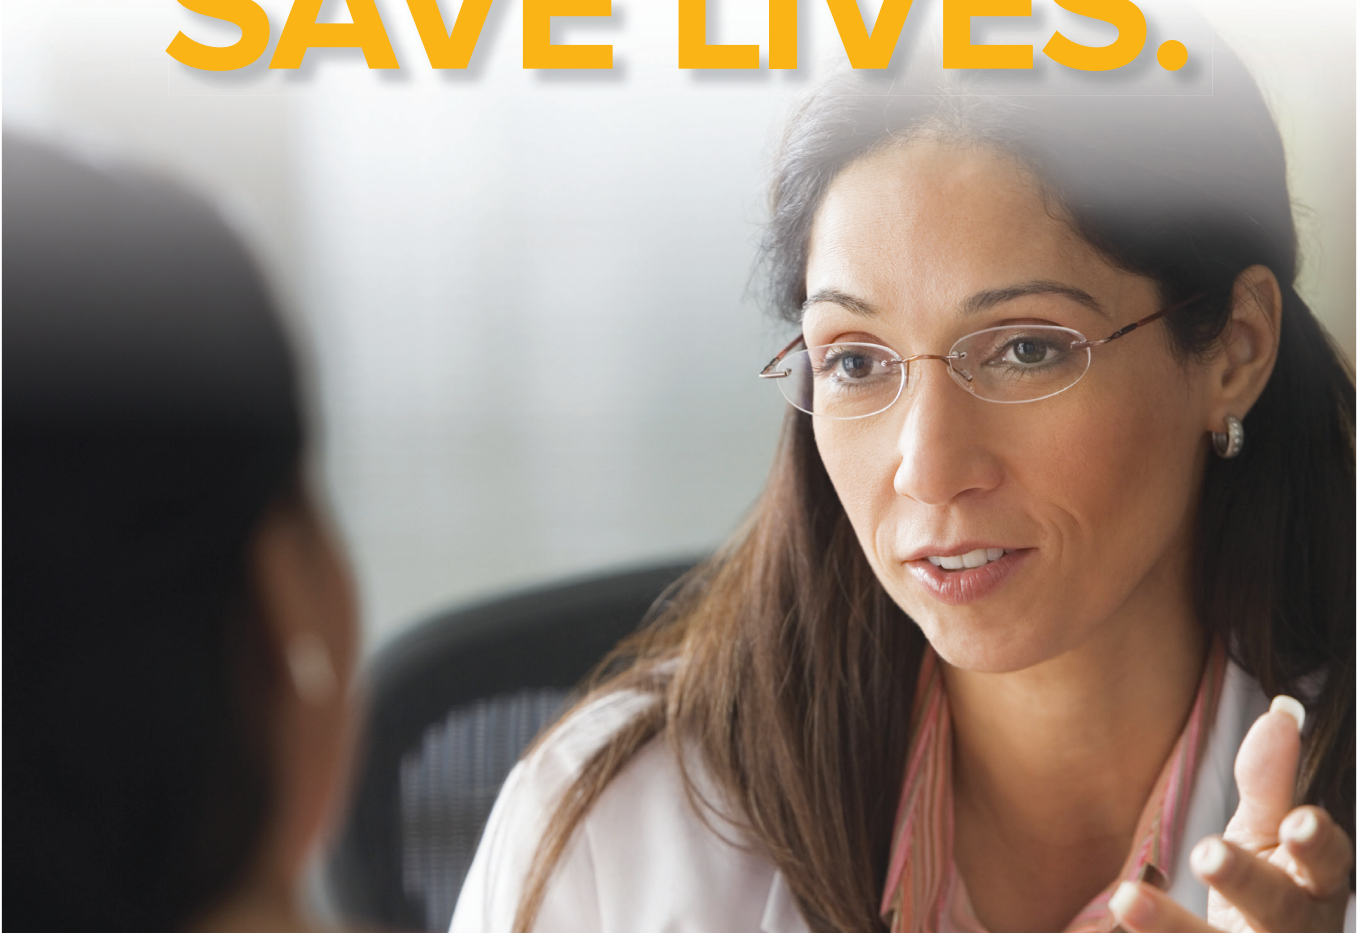

**Treating tobacco use is an important part of mental health treatment.**

**Double your patients' chances of quitting with counseling and medication.**

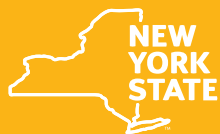

**Department  
of Health**

**[TalkToYourPatients.health.ny.gov](http://TalkToYourPatients.health.ny.gov)**

U.S. Dept. of Health and Human Services, Public Health Service, Treating Tobacco Use and Dependence Clinical Practice Guideline 2008 Update

# Treating Tobacco use is an Important Part of Mental Health Treatment

## Six Things Every Health Care Provider Should Know

Providers who treat people with mental health conditions have an important role to play in their patients' ability to quit using tobacco products. Here are six things that every provider should know:

### 1. Providing smoking cessation treatment is an important part of mental health treatment.

Providers who treat people with mental health conditions are well positioned to help patients successfully quit tobacco use and enjoy the mental, emotional, and physical benefits of a tobacco-free life. Smoking cessation treatments work.

### 2. Medicaid reimburses for counseling and covers FDA-approved smoking cessation medications, including over-the-counter therapies with a fiscal order.

Medicaid will cover repeated treatment and prescriptions because it can take multiple attempts before patients quit successfully. Medicaid covers nicotine replacement therapies (NRT) – patch, gum, lozenge, inhaler and nasal spray; and two non-nicotine oral medications (pills) – bupropion SR (brand names Zyban or Wellbutrin) and varenicline (brand name Chantix).

### 3. People with mental health conditions smoke at rates that are at least two times higher than the general population.<sup>1</sup>

They may also smoke more heavily and frequently, compared to those without mental health conditions. The Centers for Disease Control and Prevention estimates that nearly one third (31%) of all cigarettes consumed in the United States are smoked by people with mental health conditions.<sup>1</sup>

### 4. The high rates of smoking among people with mental health conditions have devastating health consequences.

Smoking-related diseases such as cardiovascular disease, lung disease, and cancer are among the most common causes of death among adults with mental health conditions.<sup>2</sup> Despite the heavy disease burden, a US national survey of mental health treatment facilities found that only about one-quarter provided services to help patients quit smoking.<sup>3</sup>

### 5. Many smokers with mental health conditions want to and are able to quit smoking.<sup>4</sup>

Research has shown that adult smokers with mental health conditions—like other smokers—want to quit, can quit, and benefit from proven smoking cessation treatments.<sup>5</sup>

### 6. Quitting smoking will not interfere with mental health recovery and may have mental health benefits.

Smoking is not an effective mental health treatment strategy. On the contrary, smoking is associated with poor clinical outcomes, such as greater depressive symptoms, greater likelihood of psychiatric hospitalization, and increased suicidal behavior.<sup>4</sup>

#### References

- Centers for Disease Control and Prevention. (2013). Vital signs: Current cigarette smoking among adults aged  $\geq 18$  years with mental illness— United States, 2009–2011. *Morbidity and Mortality Weekly Report*, 62(5), 81–7.
- Druss, B. G., Zhao, L., Von Esenwein, S., Morrato, E. H., & Marcus, S. C. (2011). Understanding excess mortality in persons with mental illness: 17-Year follow up of a nationally representative US survey. *Medical Care*, 49(6), 599-604.
- Substance Abuse and Mental Health Services Administration. (2014). The National Mental Health Services Survey (N-MHSS) data spotlight report, November 25, 2014. [http://www.samhsa.gov/data/sites/default/files/Spot148\\_NMHS\\_Smoking\\_Cessation/NMHS-Spot148-QuitSmoking-2014.pdf](http://www.samhsa.gov/data/sites/default/files/Spot148_NMHS_Smoking_Cessation/NMHS-Spot148-QuitSmoking-2014.pdf). Accessed January 15, 2016.
- Prochaska, J. J. (2011). Smoking and mental illness—Breaking the link. *New England Journal of Medicine*, 365(3), 196-198.
- Siru, R., Hulse, G. K., & Tait, R. J. (2009). Assessing motivation to quit smoking in people with mental illness: a review. *Addiction*, 104(5), 719-733.

# We've got you covered

## APA Endorsed Professional Liability Insurance

The use of telepsychiatry is increasing and projected to expand. With the significant increase in cyber attacks against individuals and businesses, psychiatrists who maintain confidential and sensitive data are prime targets, regardless of having a private practice or working for a company.

We provide comprehensive professional liability coverage, which includes telebehavioral health coverage. What's more, our insureds have the opportunity to purchase a cyber protection endorsement allowing for peace of mind and the ability to concentrate on what psychiatrists do best, helping others.

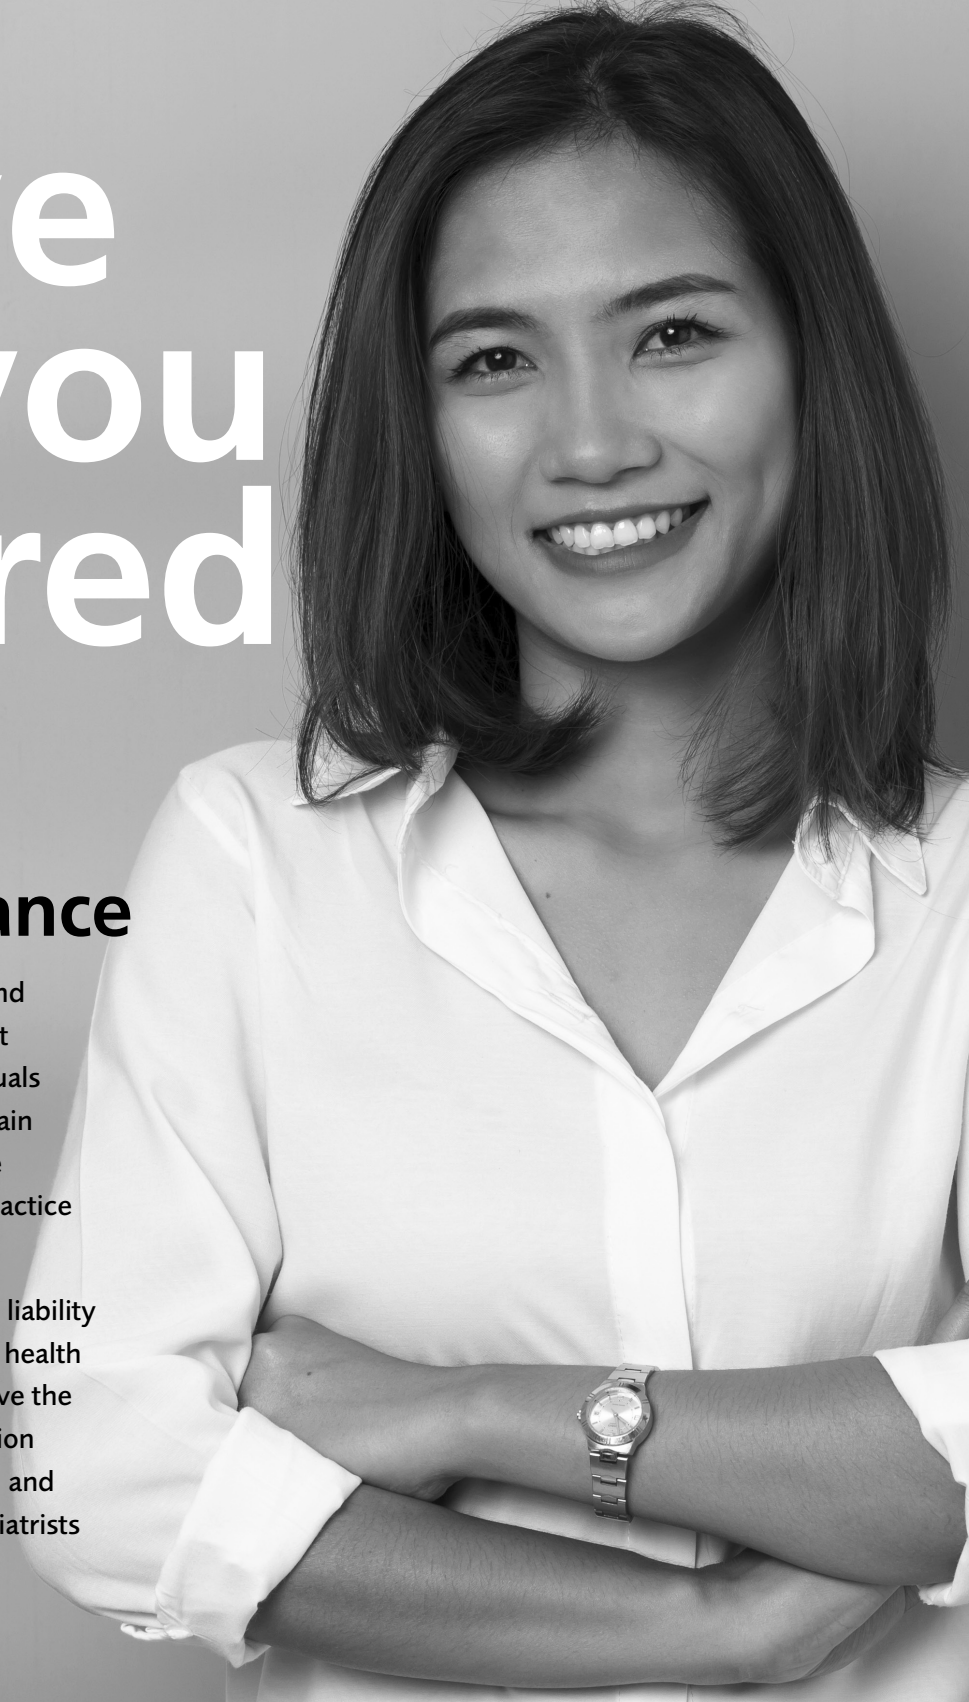

Visit us at [apamalpractice.com](http://apamalpractice.com) or call (800) 421-6694 Ext. 2318 to learn more.

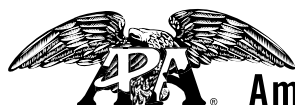

**American Professional Agency**

LEADERS IN PSYCHIATRIC MEDICAL LIABILITY INSURANCE

ENDORSED BY

AMERICAN  
PSYCHIATRIC  
ASSOCIATION

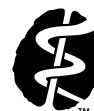

Source: http://ajp.psychiatryonline.org/doi/suppl/10.1176/ajp.2022.179.issue-4/suppl_file/back.pdf
