# The American Journal of Psychiatry

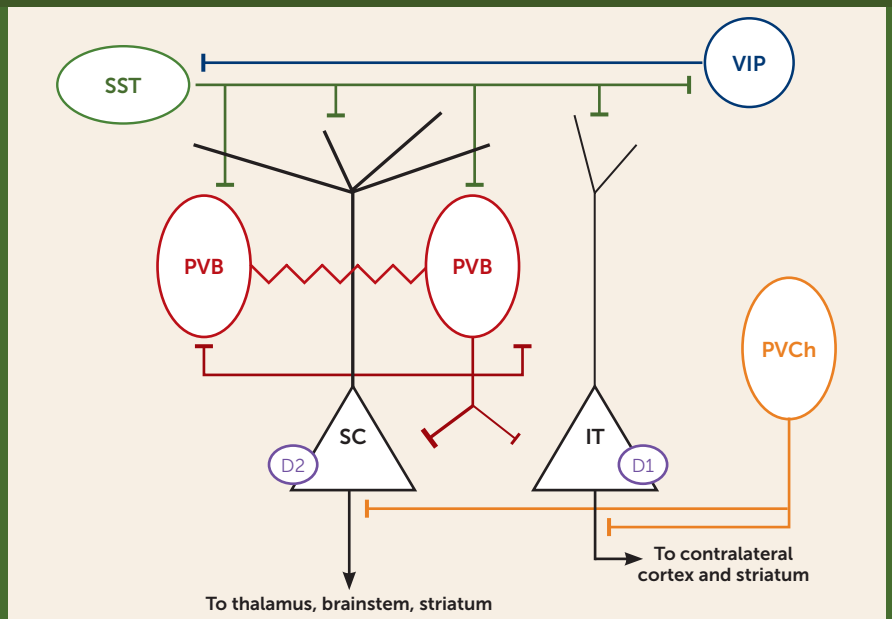

Transforming Discoveries About Cortical Microcircuits and  
Gamma Oscillations Into New Treatments for Cognitive  
Deficits in Schizophrenia

Synaptic Variability and Cortical Gamma Oscillation Power  
in Schizophrenia

Association of Medication Treatment for Opioid Use Disorder  
With Suicide Mortality

Effects of County-Level Opioid Dispensing Rates on  
Individual-Level Patterns of Prescription Opioid and  
Heroin Consumption
